# Supplementary material
Source: MDPI journal article supplement (https://www.mdpi.com/1424-2818/12/4/141)

**Figure S1.** Diversity profiles of plant communities. It includes the diversity profiles (plant species diversity) with Hill's series for 12 grassland sites with varying time since the last fire event (Time Since Fire).

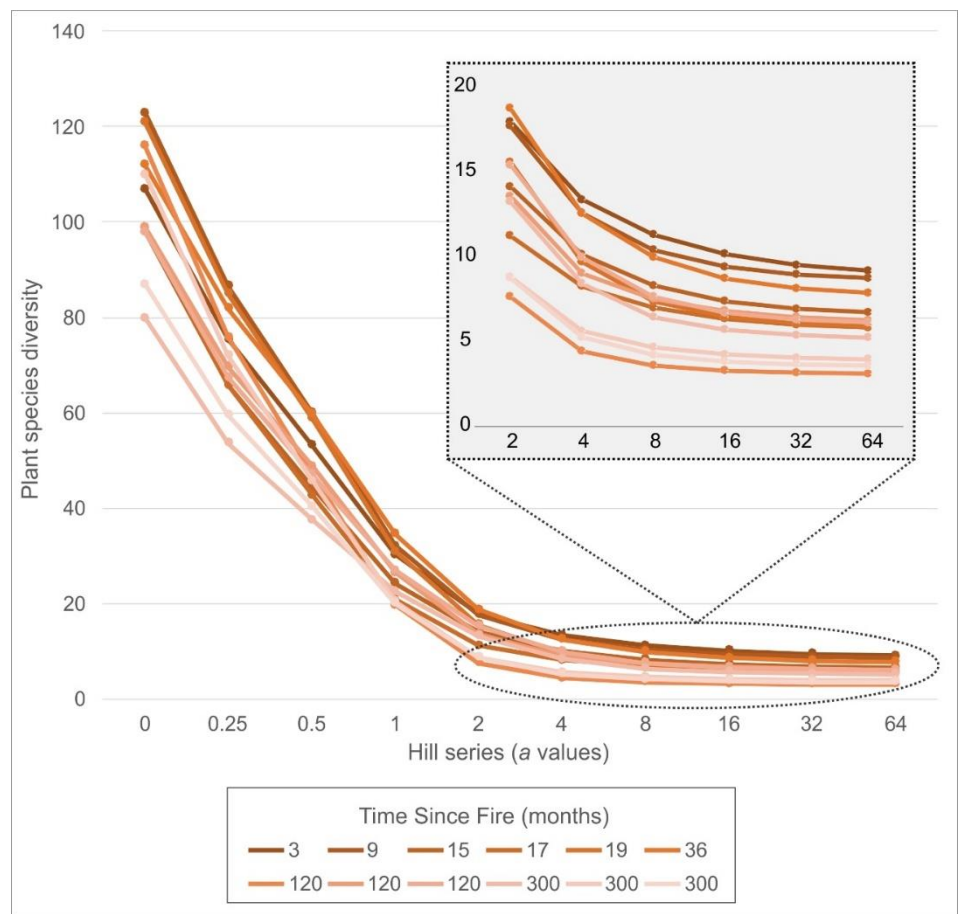

## Figures S2-12

Species distribution of network modules in all sampled networks. It includes two lists, one of plants and other with flower visitor species complete name and the respective code in the modules. Site legends: Morro do Osso Natural Park (MO), Saint'Hilaire Municipal Park (SH), São Pedro Wildlife Refuge (SP) and Itapuã State Park (PI).

List of plant species name and respective codes.

| Plant species complete name                          | Plant code | Plant species complete name        | Plant code |
|------------------------------------------------------|------------|------------------------------------|------------|
| <i>Abutilon malachroides</i>                         | Ab_ma      | <i>Habranthus pedunculatus</i>     | Ha_pe      |
| <i>Aeschynomene falcata</i>                          | Ae_fa      | <i>Herbertia pulchella</i>         | He_pu      |
| <i>Aldama nudicaulis</i>                             | Al_nu      | <i>Hieracium commersonii</i>       | Hi_co      |
| <i>Angelonia integerrima</i>                         | An_in      | <i>Holocheilus brasiliensis</i>    | Ho_br      |
| <i>Asclepias mellodora</i>                           | As_me      | <i>Hypericum brasiliense</i>       | Hy_br      |
| <i>Aspilia montevidensis</i>                         | As_mo      | <i>Ipomea</i> sp.1                 | Ip_sp      |
| <i>Austroeupatorium inulaefolium</i>                 | Au_in      | <i>Ipomoea uruguayensis</i>        | Ip_ur      |
| <i>Austroeupatorium laetevirens</i>                  | Au_la      | <i>Janusia guaranitica</i>         | Ja_gu      |
| <i>Baccharis articulata</i>                          | Ba_ar      | <i>Lantana camara</i>              | La_ca      |
| <i>Baccharis crispa</i>                              | Ba_cr      | <i>Lessingianthus brevifolius</i>  | Le_br      |
| <i>Baccharis leucopappa</i>                          | Ba_le      | <i>Macroptilium prostratum</i>     | Ma_pr      |
| <i>Baccharis psiadioides</i>                         | Ba_ps      | <i>Mimosa dolens</i>               | Mi_do      |
| <i>Baccharis riograndensis</i>                       | Ba_ri      | <i>Mimosa sanguinolenta</i>        | Mi_sa      |
| <i>Baccharis sagittalis</i>                          | Ba_sa      | <i>Mimosa</i> sp.1                 | Mi_1       |
| <i>Baccharis tridentata</i>                          | Ba_tr      | <i>Monnina oblongifolia</i>        | Mo_ob      |
| <i>Borreria brachystemonoides</i>                    | Bo_br      | <i>Nothoscordum montevidensis</i>  | No_mo      |
| <i>Calea uniflora</i>                                | Ca_un      | <i>Pamphalea commersonii</i>       | Pa_co      |
| <i>Calibrachoa excellens</i>                         | Ca_ex      | <i>Parodia ottonis</i>             | Pa_ot      |
| <i>Campomanesia aurea</i>                            | Ca_au      | <i>Pavonia friesii</i>             | Pa_fr      |
| <i>Campuloclinium macrocephalum</i>                  | Ca_ma      | <i>Petunia integrifolia</i>        | Pe_in      |
| <i>Centrosema virginianum</i>                        | Ce_vi      | <i>Pfaffia tuberosa</i>            | Pf_tu      |
| <i>Chamaecrista repens</i>                           | Ch_re      | <i>Piriqueta taubatensis</i>       | Pi_ta      |
| <i>Chromolaena ascendens</i>                         | Ch_as      | <i>Porophyllum curticeps</i>       | Po_cu      |
| <i>Chromolaena ascendens</i> var. <i>parasitosum</i> | Ch_as_pa   | <i>Pterocaulon angustifolium</i>   | Pt_an      |
| <i>Chromolaena hirsuta</i>                           | Ch_hi      | <i>Rhynchosia corylifolia</i>      | Rh_co      |
| <i>Chromolaena laevigata</i>                         | Ch_la      | <i>Rhynchospora setigera</i>       | Rh_se      |
| <i>Chrysolaena flexuosa</i>                          | Ve_fl      | <i>Richardia grandiflora</i>       | Ri_gr      |
| <i>Collaea stenophylla</i>                           | Co_st      | <i>Schlechtendalia luzulifolia</i> | Sc_lu      |
| <i>Commelina erecta</i>                              | Co_er      | <i>Senecio heterotrichius</i>      | Se_he      |
| <i>Croton gnaphalii</i>                              | Cr_gn      | <i>Sida regnellii</i>              | Si_re      |
| <i>Cypella amplimaculata</i>                         | Cy_am      | <i>Sinningia allagophylla</i>      | Si_al      |
| <i>Cypella herbertii</i>                             | Cy_he      | <i>Sisyrinchium avenaceum</i>      | Si_av      |
| <i>Desmodium cuneatum</i>                            | De_cu      | <i>Sisyrinchium megapotamicum</i>  | Si_me      |
| <i>Disynaphia ligulifolia</i>                        | Di_li      | <i>Sisyrinchium palmifolium</i>    | Si_pa      |
| <i>Dyckia choristaminea</i>                          | Dy_ch      | <i>Sisyrinchium vaginatum</i>      | Si_va      |
| <i>Dyckia leptostachya</i>                           | Dy_le      | <i>Solanum sisymbriifolium</i>     | So_si      |
| <i>Epidendrum fulgens</i>                            | Ep_fu      | <i>Solidago chilensis</i>          | So_ch      |
| <i>Eryngium ciliatum</i>                             | Er_ci      | <i>Stachytarpheta cayennensis</i>  | St_ca      |
| <i>Eryngium elegans</i>                              | Er_el      | <i>Stenocephalum megapotamicum</i> | St_me      |
| <i>Eryngium eriophorum</i>                           | Er_er      | <i>Symphiopappus reticulatus</i>   | Sy_re      |
| <i>Eryngium horridum</i>                             | Er_ho      | <i>Tibouchina gracilis</i>         | Ti_gr      |
| <i>Eryngium megapotamicum</i>                        | Er_me      | <i>Trixis nobilis</i>              | Tr_no      |
| <i>Eryngium pristis</i>                              | Er_pr      | <i>Varronia curassavica</i>        | Va_cu      |
| <i>Eryngium sanguisorba</i>                          | Er_sa      | <i>Verbena intermedia</i>          | Ve_in      |
| <i>Evolvulus glomeratus</i>                          | Ev_gl      | <i>Verbena sagittalis</i>          | Ve_sa      |
| <i>Evolvulus sericeus</i>                            | Ev_se      | <i>Verbesina sordescens</i>        | Ve_so      |

| Plant species complete name | Plant code | Plant species complete name     | Plant code |
|-----------------------------|------------|---------------------------------|------------|
| <i>Galianthe fastigiata</i> | Ga_fa      | <i>Vernonanthura lucida</i>     | Ve_lu      |
| <i>Gelasine elongata</i>    | Ge_el      | <i>Vernonanthura squamulosa</i> | Ve_sq      |
| <i>Glechon ciliata</i>      | Gl_ci      | <i>Vernonanthura nudiflora</i>  | Ve_nu      |
| <i>Glechon marifolia</i>    | Gl_ma      | <i>Vernonia hypochaeris</i>     | Ve_hy      |
| <i>Grazielia intermedia</i> | Gr_in      | <i>Walemburgia linarioides</i>  | Wa_li      |
| <i>Gyptis pinnatifida</i>   | Gy_pi      | <i>Waltheria douradinha</i>     | Wa_do      |
|                             |            | <i>Wissadula glechomifolia</i>  | Wi_gl      |

List of flower visitors species/morphospecies and respective codes.

| Insect species/morphospecies complete name | Insect code | Insect species/morphospecies complete name | Insect code |
|--------------------------------------------|-------------|--------------------------------------------|-------------|
| Melyridae sp.1                             | Mely_1      | Diptera sp.6                               | Dipt_6      |
| Syrphidae sp.1                             | Syrp_1      | Diptera sp.7                               | Dipt_7      |
| Alticini sp.1                              | Alti_1      | Diptera sp.8                               | Dipt_8      |
| Alticini sp.2                              | Alti_2      | Diptera sp.46                              | Dipt_46     |
| Alticini sp.3                              | Alti_3      | Elateridae sp.1                            | Elat_1      |
| Anthribidae sp.1                           | Anth_1      | Elateridae sp.2                            | Elat_2      |
| <i>Apis mellifera</i>                      | Ap_me       | Ensifera sp.1                              | Ensi_1      |
| <i>Augochlora</i> sp.2                     | Au_ra_2     | Ensifera sp.2                              | Ensi_2      |
| <i>Augochlora</i> sp.3                     | Au_ra_3     | Ensifera sp.3                              | Ensi_3      |
| <i>Augochlora</i> sp.4                     | Au_ra_4     | Ensifera sp.4                              | Ensi_4      |
| <i>Augochlorella</i> sp.1                  | Au_la_1     | Ensifera sp.5                              | Ensi_5      |
| <i>Augochlorella</i> sp.2                  | Au_la_2     | Ensifera sp.6                              | EnsF_1      |
| <i>Augochlorella</i> sp.3                  | Au_la_3     | Eucerini sp.1                              | Euce_1      |
| <i>Augochlorini</i> sp.3                   | Au_ni_3     | Eumolpinae sp.1                            | Eumo_1      |
| <i>Augochlorini</i> sp.4                   | Au_ni_4     | <i>Euphoria lurida</i>                     | Eu_lu       |
| <i>Augochlorini</i> sp.5                   | Au_ni_5     | Halictini sp.1                             | Ha_ni_1     |
| <i>Augochlorini</i> sp.6                   | Au_ni_6     | Halictini sp.3                             | Ha_ni_3     |
| <i>Augochlorini</i> sp.7                   | Au_ni_7     | Halictini sp.4                             | Ha_ni_4     |
| <i>Augochlorini</i> sp.8                   | Au_ni_8     | Halictini sp.5                             | Ha_ni_5     |
| <i>Augochloropsis</i> sp.1                 | Au_is_1     | Halictini sp.6                             | Hali_6      |
| <i>Augochloropsis</i> sp.2                 | Au_is_2     | Halictini sp.6                             | Ha_ni_6     |
| <i>Augochlorini</i> sp.4                   | Au_ni_4     | Halictini sp.7                             | Ha_ni_7     |
| Bardinae sp.1                              | Bard_1      | Hymenoptera sp.1                           | Hyme_1      |
| Bardinae sp.2                              | Bard_2      | Hymenoptera sp.2 (micro)                   | MHym_2      |
| Bardinae sp.3                              | Bard_3      | Hymenoptera sp.3                           | Hyme_3      |
| Bardinae sp.4                              | Bard_4      | Hymenoptera sp.4                           | Hyme_4      |
| <i>Bombus morio</i>                        | Bo_mo       | Hymenoptera sp.5 (micro)                   | MHym_3      |
| Bruchinae sp.1                             | Bruc_1      | Hymenoptera sp.6 (micro)                   | Mhym_4      |
| Buprestidae sp.1                           | Bupr_1      | Hymenoptera sp.7 (micro)                   | Mhym_5      |
| Caelifera sp.1                             | Cael_1      | Hymenoptera sp.8 (micro)                   | Mhym_6      |
| Caelifera sp.2                             | CaeF_1      | Hymenoptera sp.9 (micro)                   | Mhym_7      |
| Caelifera sp.3                             | CaeF_2      | Lagriinae sp.1                             | Lagr_1      |
| Caliphoridae sp.1                          | Cali_1      | <i>Lasionota</i> sp.1                      | Lasi_1      |
| Caliphoridae sp.2                          | Cali_2      | <i>Lema</i> sp.1                           | Lema_1      |
| Caliphoridae sp.3                          | Cali_3      | Lepidoptera sp.1                           | Lepi_1      |
| Cantharidae sp.1                           | Cant_1      | Lepidoptera sp.2                           | Lepi_2      |
| Cantharidae sp.2                           | Cant_2      | Lepidoptera sp.3                           | Lepi_3      |
| Cantharidae sp.3                           | Cant_3      | Lepidoptera sp.4                           | Lepi_4      |
| <i>Ceratina</i> sp.1                       | Cera_1      | Lepidoptera sp.5                           | Lepi_5      |
| <i>Ceratina</i> sp.2                       | Cera_2      | Lepidoptera sp.6                           | LepF_1      |
| <i>Ceratina</i> sp.3                       | Cera_3      | Lepidoptera sp.7                           | LepF_2      |
| <i>Ceratina</i> sp.4                       | Cera_4      | Lepidoptera sp.8                           | LepF_3      |
| <i>Ceratina</i> sp.5                       | Cera_5      | <i>Lexyphanes biplagiatus</i>              | Le_bi       |

| <b>Insect species/morphospecies<br/>complete name</b> | <b>Insect code</b> | <b>Insect species/morphospecies<br/>complete name</b> | <b>Insect code</b> |
|-------------------------------------------------------|--------------------|-------------------------------------------------------|--------------------|
| <i>Ceratina</i> sp.6                                  | Cera_6             | <i>Macraspis dichroa</i>                              | Ma_di              |
| <i>Ceratina</i> sp.7                                  | Cera_7             | Megachiline sp.1                                      | Mega_1             |
| <i>Ceratina</i> sp.8                                  | Cera_8             | Megachiline sp.2                                      | Mega_2             |
| <i>Chauliognathus</i> sp.1                            | Chau_1             | Megachiline sp.3                                      | Mega_3             |
| <i>Chrysoprasis</i> sp.1                              | Chry_1             | Megachiline sp.4                                      | Mega_4             |
| Clytrini sp.1                                         | Clyt_1             | Megachiline sp.5                                      | Mega_5             |
| Coccinelidae sp.1                                     | Cocc_1             | Megachiline sp.6                                      | Mega_6             |
| <i>Corvicoana reticulata</i>                          | Co_re              | Melandryidae sp.1                                     | Mely_1             |
| Cryptocephalinae sp.1                                 | Cryp_1             | Meliponini sp.1                                       | Meli_1             |
| Curculionidae sp.1                                    | Curc_1             | <i>Melitoma segmentaria</i>                           | Me_se              |
| Curculionidae sp.10                                   | Curc_10            | Melyridae sp.1                                        | Mely_1             |
| Curculionidae sp.11                                   | Curc_11            | Melyridae sp.2                                        | Mely_2             |
| Curculionidae sp.12                                   | Curc_12            | Melyridae sp.3                                        | Mely_3             |
| Curculionidae sp.13                                   | Curc_13            | Melyridae sp.4                                        | Mely_4             |
| Curculionidae sp.14                                   | Curc_14            | Mordellidae sp.1                                      | Mord_1             |
| Curculionidae sp.15                                   | Curc_15            | Nitidulidae sp.1                                      | Niti_1             |
| Curculionidae sp.16                                   | Curc_16            | Phasmatodea sp.1                                      | Phas_1             |
| Curculionidae sp.17                                   | Curc_17            | <i>Plebeia droryana</i>                               | Pl_dr              |
| Curculionidae sp.2                                    | Curc_2             | <i>Plebeia emerina</i>                                | Pl_em              |
| Curculionidae sp.4                                    | Curc_4             | <i>Pristimerus</i> sp.1                               | Pris_1             |
| Curculionidae sp.5                                    | Curc_5             | <i>Rhopitulus</i> sp.1                                | Rhop_1             |
| Curculionidae sp.6                                    | Curc_6             | Sarcophagidae sp.1                                    | Sarc_1             |
| Curculionidae sp.8                                    | Curc_8             | Sarcophagidae sp.10                                   | Sarc_10            |
| Curculionidae sp.9                                    | Curc_9             | Sarcophagidae sp.11                                   | Sarc_11            |
| <i>Cycloneda sanguinea</i>                            | Cy_sa              | Sarcophagidae sp.12                                   | Sarc_12            |
| Diabrotica sp.1                                       | Diab_1             | Sarcophagidae sp.13                                   | Sarc_13            |
| Diabrotica sp.2                                       | Diab_2             | Sarcophagidae sp.14                                   | Sarc_14            |
| <i>Dialictus pabulator</i>                            | Di_pa              | Sarcophagidae sp.15                                   | Sarc_15            |
| Diptera sp.1                                          | Dipt_1             | Sarcophagidae sp.16                                   | Sarc_16            |
| Diptera sp.10                                         | Dipt_10            | Sarcophagidae sp.17                                   | Sarc_17            |
| Diptera sp.12                                         | Dipt_12            | Sarcophagidae sp.18                                   | Sarc_18            |
| Diptera sp.13                                         | Dipt_13            | Sarcophagidae sp.19                                   | Sarc_19            |
| Diptera sp.15                                         | Dipt_15            | Sarcophagidae sp.2                                    | Sarc_2             |
| Diptera sp.16                                         | Dipt_16            | Sarcophagidae sp.20                                   | SarF_1             |
| Diptera sp.17                                         | Dipt_17            | Sarcophagidae sp.3                                    | Sarc_3             |
| Diptera sp.18                                         | Dipt_18            | Sarcophagidae sp.4                                    | Sarc_4             |
| Diptera sp.19                                         | Dipt_19            | Sarcophagidae sp.5                                    | Sarc_5             |
| Diptera sp.20                                         | Dipt_20            | Sarcophagidae sp.6                                    | Sarc_6             |
| Diptera sp.22                                         | Dipt_22            | Sarcophagidae sp.7                                    | Sarc_7             |
| Diptera sp.23                                         | Dipt_23            | Sarcophagidae sp.8                                    | Sarc_8             |
| Diptera sp.24                                         | Dipt_24            | Sarcophagidae sp.9                                    | Sarc_9             |
| Diptera sp.25                                         | Dipt_25            | <i>Scaptotrigona bipunctata</i>                       | Sc_bi              |
| Diptera sp.26                                         | Dipt_26            | Syrphidae sp.1                                        | Syrp_1             |
| Diptera sp.27                                         | Dipt_27            | Syrphidae sp.10                                       | SyrF_2             |
| Diptera sp.28                                         | Dipt_28            | Syrphidae sp.2                                        | Syrp_2             |
| Diptera sp.29                                         | Dipt_29            | Syrphidae sp.3                                        | Syrp_3             |
| Diptera sp.30                                         | Dipt_30            | Syrphidae sp.4                                        | Syrp_4             |
| Diptera sp.31                                         | Dipt_31            | Syrphidae sp.5                                        | Syrp_5             |
| Diptera sp.32                                         | Dipt_32            | Syrphidae sp.6                                        | Syrp_6             |
| Diptera sp.33                                         | Dipt_33            | Syrphidae sp.7                                        | Syrp_7             |
| Diptera sp.34                                         | Dipt_34            | Syrphidae sp.8                                        | Syrp_8             |
| Diptera sp.35                                         | Dipt_35            | Syrphidae sp.9                                        | SyrF_1             |
| Diptera sp.36                                         | Dipt_36            | Tapinotaspidini sp.1                                  | Tapi_1             |
| Diptera sp.37                                         | Dipt_37            | <i>Tetragonisca fiebrigi</i>                          | Te_fi              |
| Diptera sp.38                                         | Dipt_38            | <i>Thygater analis</i>                                | Th_an              |

| <b>Insect species/morphospecies<br/>complete name</b> | <b>Insect code</b> | <b>Insect species/morphospecies<br/>complete name</b> | <b>Insect code</b> |
|-------------------------------------------------------|--------------------|-------------------------------------------------------|--------------------|
| Diptera sp.39                                         | Dipt_39            | Thysanoptera sp.1                                     | Thys_1             |
| Diptera sp.4                                          | Dipt_4             | Thysanoptera sp.2                                     | Thys_2             |
| Diptera sp.40                                         | Dipt_40            | Thysanoptera sp.3                                     | Thys_3             |
| Diptera sp.41                                         | Dipt_41            | <i>Trigona spinipes</i>                               | Tr_sp              |
| Diptera sp.42                                         | Dipt_42            | Vespididae sp.4                                       | Vesp_4             |
| Diptera sp.43                                         | Dipt_43            | Vespididae sp.1                                       | Vesp_1             |
| Diptera sp.44                                         | Dipt_44            | Vespididae sp.10                                      | Vesp_10            |
| Diptera sp.45                                         | Dipt_45            | Vespididae sp.11                                      | Vesp_11            |
| Diptera sp.47                                         | Dipt_47            | Vespididae sp.12                                      | Vesp_12            |
| Diptera sp.48                                         | Dipt_48            | Vespididae sp.2                                       | Vesp_2             |
| Diptera sp.49                                         | Dipt_4B            | Vespididae sp.5                                       | Vesp_5             |
| Diptera sp.50                                         | DipF_1             | Vespididae sp.6                                       | Vesp_6             |
| Diptera sp.51                                         | DipF_2             | Vespididae sp.7                                       | Vesp_7             |
| Diptera sp.52                                         | DipF_3             | Vespididae sp.8                                       | Vesp_8             |
| Diptera sp.53                                         | DipF_4             | Vespididae sp.9                                       | Vesp_9             |
| Diptera sp.6                                          | Dipt_6             | <i>Xylocopa frontalis</i>                             | Xy_fr              |

**Figure S2.** Network modules (red polygons) from site MO1

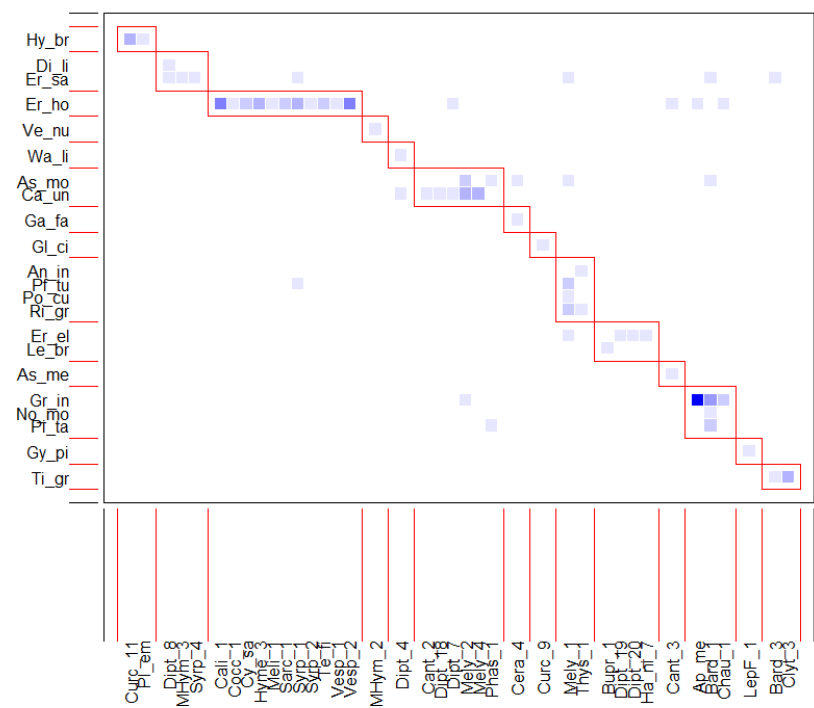

**Figure S3.** Network modules (red polygons) from site MO2

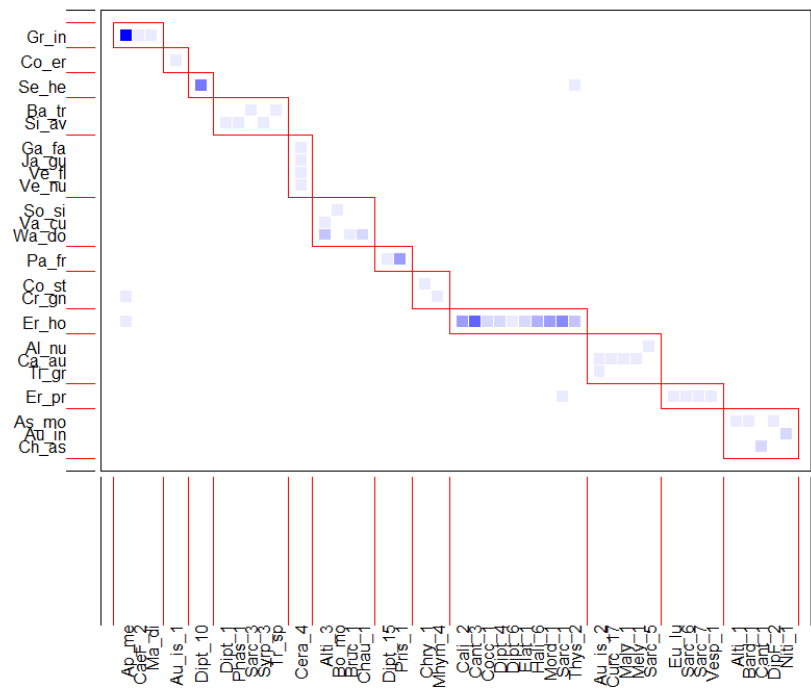

**Figure S4.** Network modules (red polygons) from site MO3

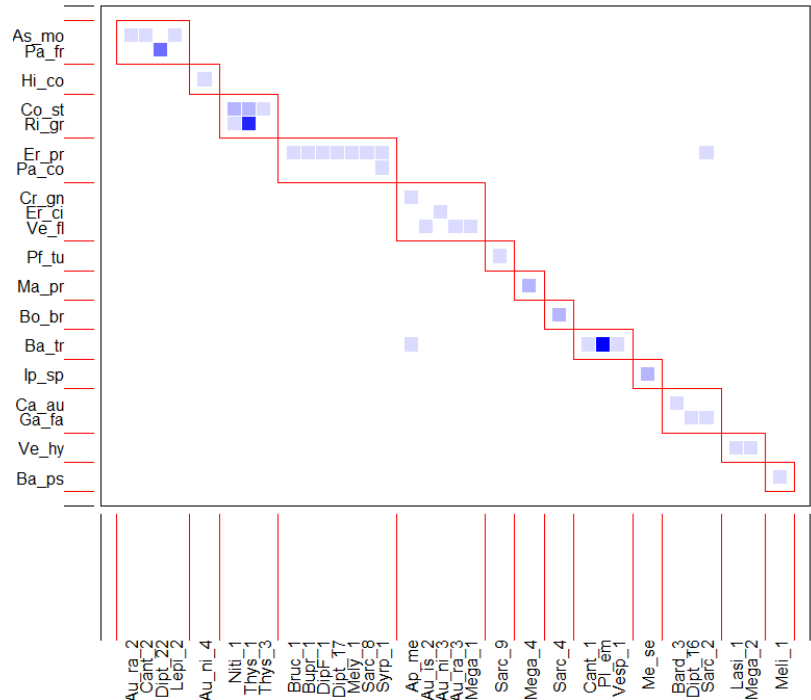

**Figure S5.** Network modules (red polygons) from site SH3

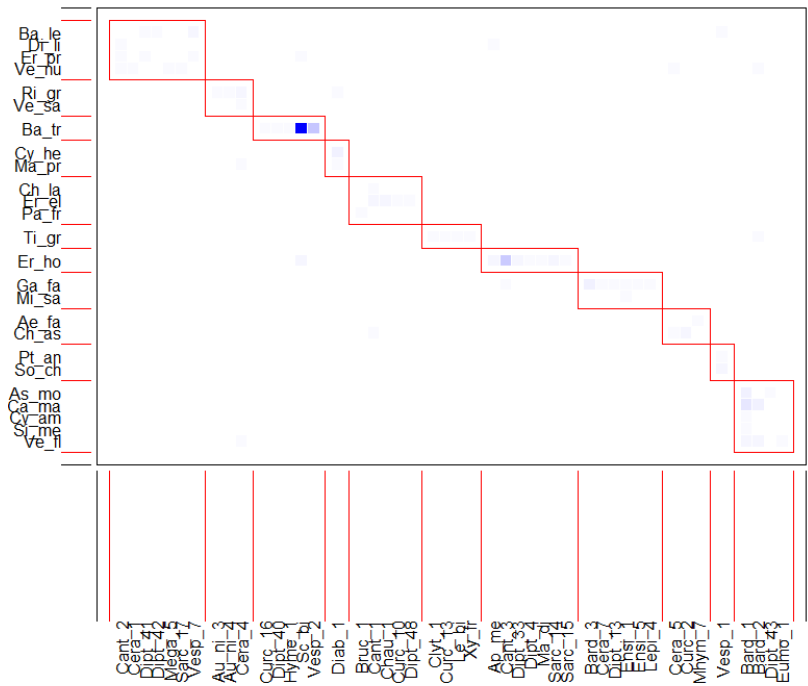

**Figure S6.** Network modules (red polygons) from site SH2

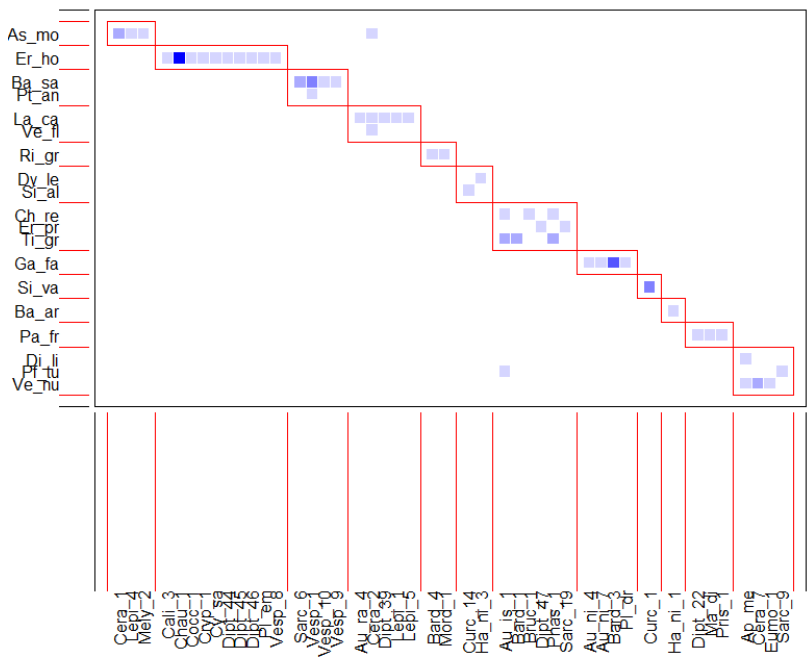



**Figure S7.** Network modules (red polygons) from site SH1

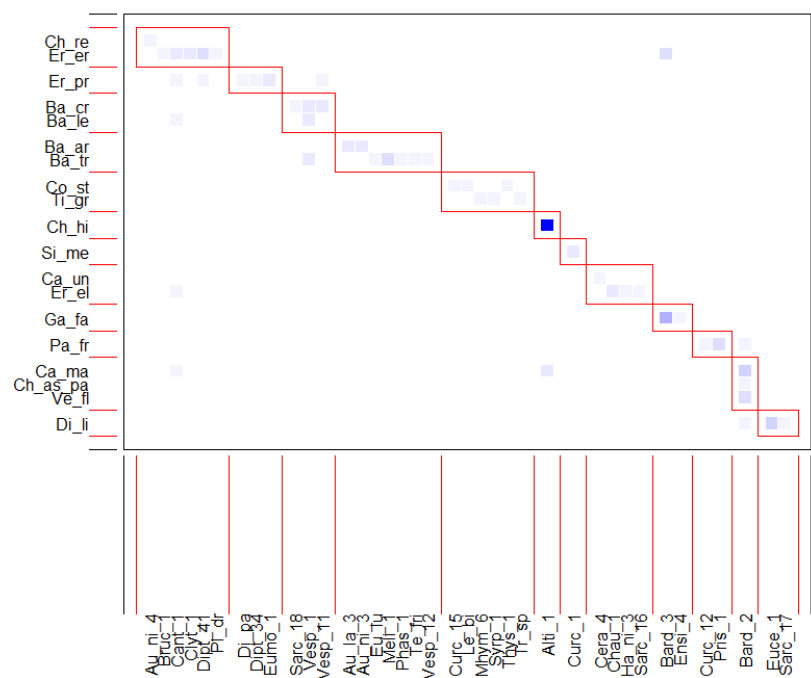

**Figure S8.** Network modules (red polygons) from site SP3

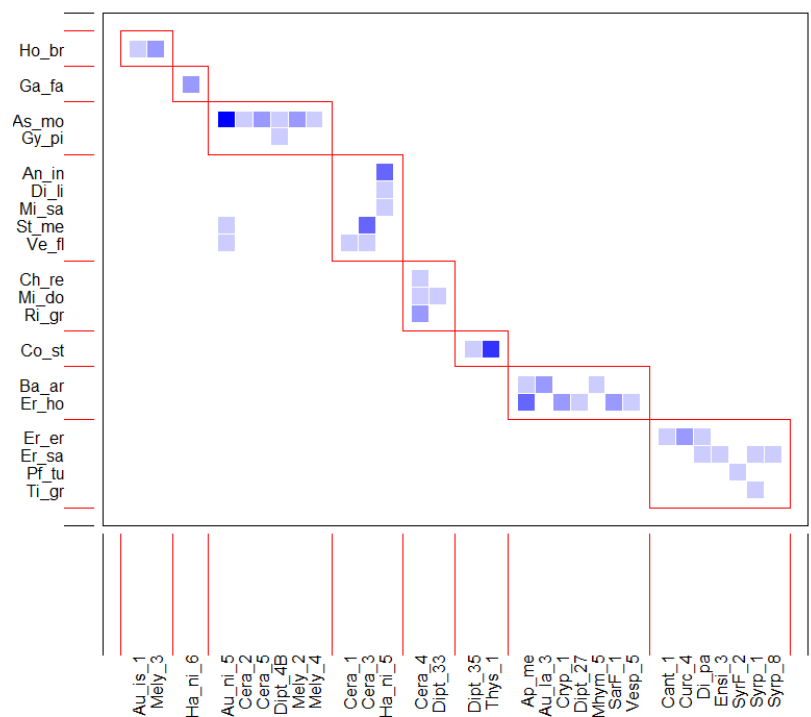

Figure S9. Network modules (red polygons) from site SP1

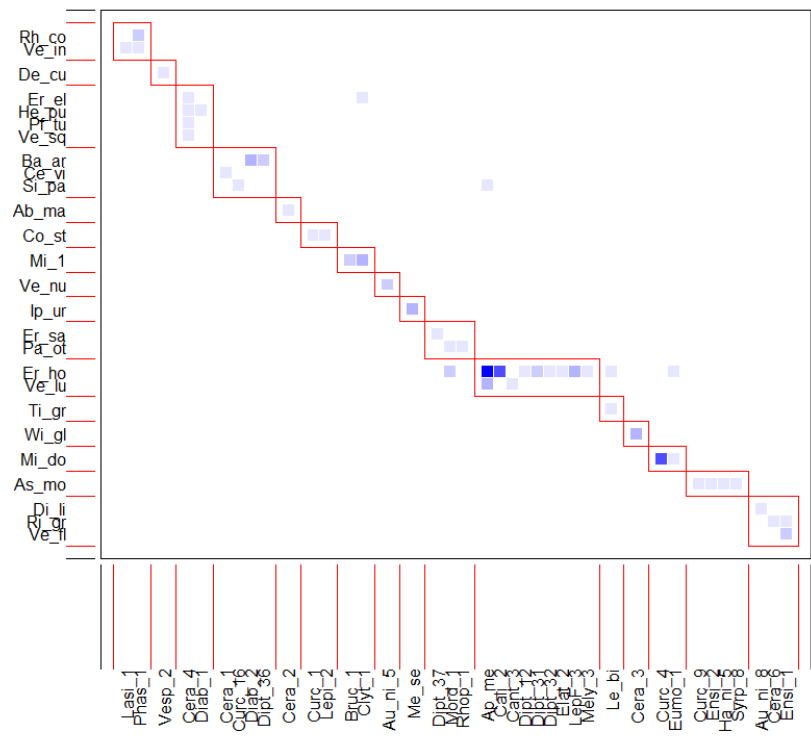

Figure S10. Network modules (red polygons) from site SP2

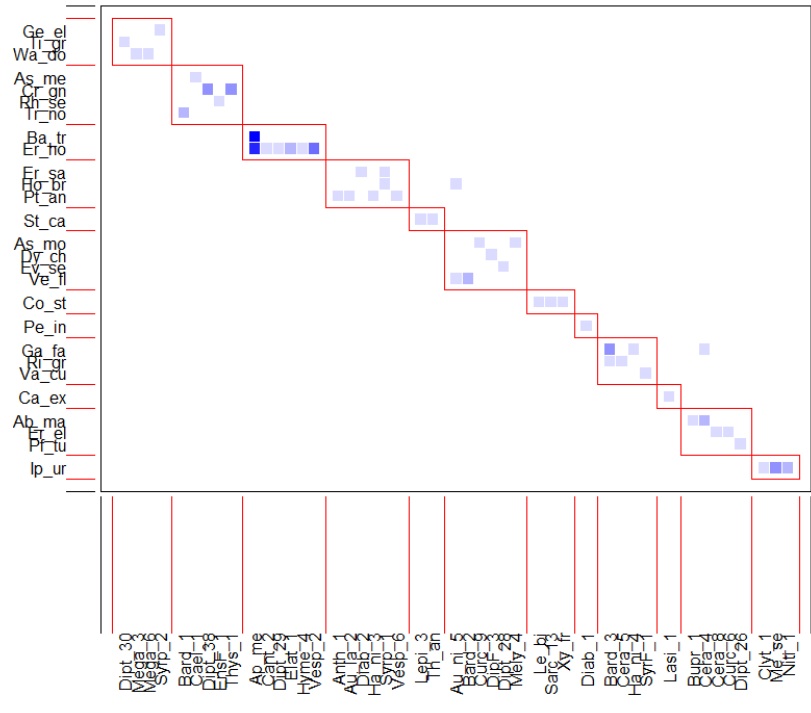

**Figure S11.** Network modules (red polygons) from site PI2

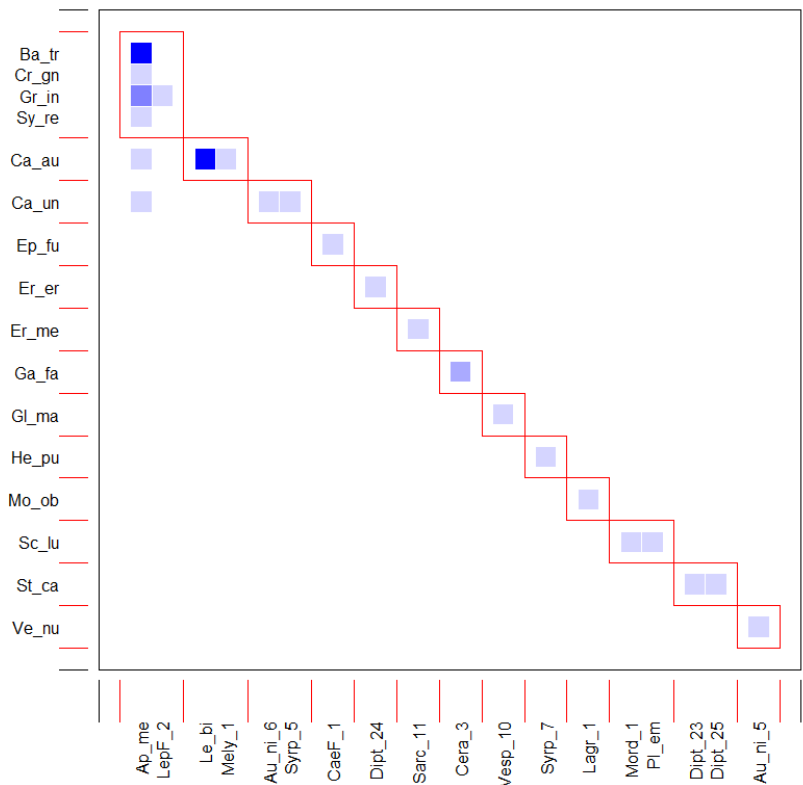

**Figure S12.** Network modules (red polygons) from site PI3

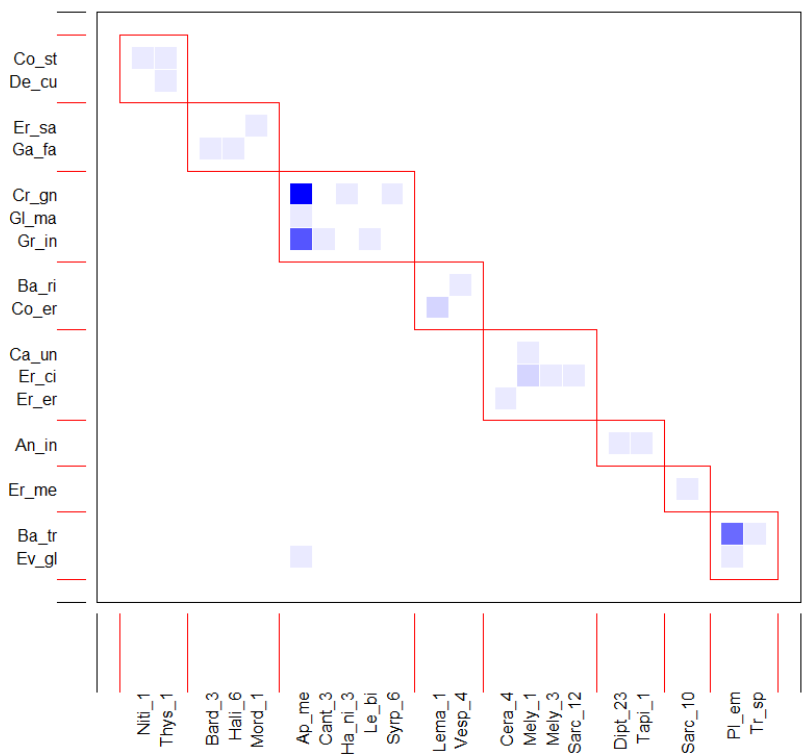

Figure S13. Network modules (red polygons) from site P11

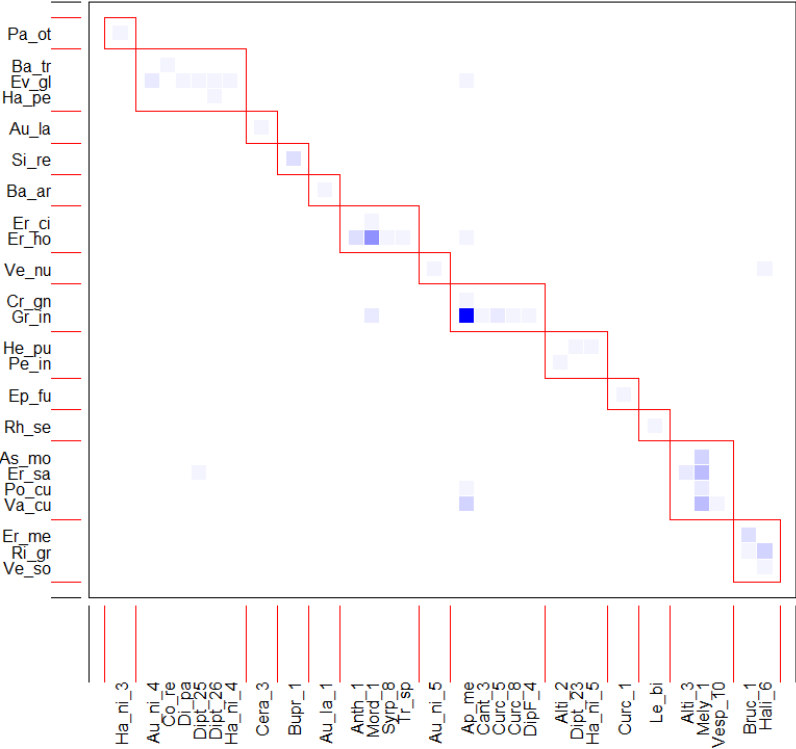

**Figure S14.** Relationship between site urbanization and network asymmetry, number of plant species, and number of flower visitor species in the networks. Equation parameters: number of flowering plants ( $\beta = 0.351$ ,  $t = 0.197$ ,  $p = 0.848$ ,  $R^2 = -0.095$ ); number of flower visitors ( $\beta = 8.363$ ,  $t = 2.264$ ,  $p = 0.047$ ,  $R^2 = 0.272$ ); network asymmetry ( $\beta = 0.116$ ,  $t = 4.041$ ,  $p = 0.002$ ,  $R^2 = 0.582$ ).

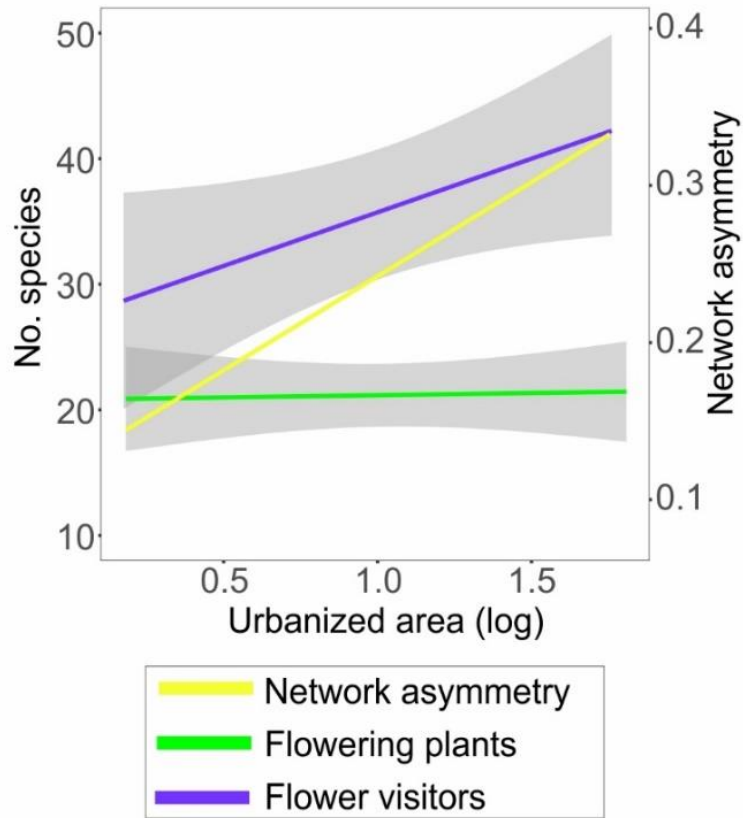

Supplement: s1 [file s1]
